# Supplementary material for: Estrogen-induced circRNA, circPGR, functions as a ceRNA to promote estrogen receptor-positive breast cancer cell growth by regulating cell cycle-related genes
Source: Theranostics. 2021 Jan 1;11(4):1732–52. doi: 10.7150/thno.45302 (PMC7778588; doi:10.7150/thno.45302)
Supplement: Supplementary file 1 — Supplementary figures. [file thnov11p1732s1.pdf]

## **Supplementary information**

### **Supplementary figure legends**

#### **Figure S1. A large number of circRNAs are detected from circRNA-seq in MCF7 cells.**

(A) Genome browser views of RNA-seq data for selected genes as indicated were shown. Blue: control (CTL); Red: estrogen (E<sub>2</sub>).

(B) Flowchart to predict circRNAs by using CIRI2.

(C) The correlation of junction reads between circRNAs identified in two biological repeats.

(D) Statistics of circRNAs with different number of junction reads predicted by CIRI2 were shown.

(E, F) Genomic location and schematic representation of TTN (E) and NEAT1 (F) gene (top) and the circRNA produced from the same gene region (bottom). CircRNA was highlighted in light blue.

(G-J) Four randomly selected circRNAs predicted by CIRI2 were PCR amplified by using divergent primer sets specifically targeting the junction regions followed by Sanger sequencing. Sequence flanking junction regions was shown. Junction sites were highlighted in light blue. Sanger sequencing histogram was shown at the bottom.

#### **Figure S2. Comparison of CircRNAs predicted by different algorithms.**

(A-C) Comparison of circRNAs predicted by CIRI2, find\_circ and CIRCexplorer2 under cutoff of junction reads of 2 (A), 5 (B) or 10 (C).

(D, H) Correlation between the number of exons a gene has and circRNAs originated from that gene based on circRNAs predicted by CIRCexplorer2 (D) or find\_circ (H).

(E, I) Correlation between the expression of parental gene (FPKM) and circRNA originated from the same gene region (average junction reads/gene) based on circRNAs predicted by CIRCexplorer2 (E) or find\_circ (I).

(F, J) Box plot showing the length of randomly selected introns or introns flanking, upstream and downstream, circRNA-producing regions based on circRNAs predicted by CIRCexplorer2 (F) or find\_circ (J).

(G, K) Percentage of randomly selected introns or introns flanking circRNA-producing regions containing inverted repeated Alu pairs based on circRNAs predicted by CIRCexplorer2 (G) or find\_circ (K).

**Figure S3. A large number of circRNAs are induced by estrogen.**

(A, B) Venn diagram showing overlapping between circRNAs predicted in both control (CTL) and estrogen (E<sub>2</sub>)-treated conditions (junction reads  $\geq 5$  (A) or 10 (B), FC  $\geq 2$ ).

(C) Genomic location, parental gene, strand information, junction reads in both control (CTL) and estrogen (E<sub>2</sub>)-treated conditions, number of cycles detected from RT-qPCR analysis, and fold induction deduced from RT-qPCR analysis of circRNAs shown in Fig. 2B.

**Figure S4. PGR has no significant impact on MCF7 cell growth.**

(A) MCF7 cells transfected with control siRNA (si-CTL) or siRNA specifically targeting circPGR (si-circPGR) were subjected to RNA extraction and RT-qPCR analysis to examine the expression of *PGR* ( $\pm$  s.e.m., \*\*\*P < 0.01).

(B) MCF7 cells transfected with control siRNA (siCTL) or two independent siRNAs specifically targeting *PGR* (siPGR#1 and siPGR#2) were subjected to RNA extraction and RT-qPCR analysis to examine the expression of *PGR* ( $\pm$  s.e.m., \*\*\*P < 0.01).

(C) MCF7 cells transfected with control siRNA (siCTL) or two independent siRNAs specifically targeting *PGR* (siPGR#1 and siPGR#2) were cultured in stripping medium and treated with or without estrogen (E<sub>2</sub>, 10<sup>-7</sup> M) for duration as indicated, followed by cell proliferation assay (NS, non-significant).

**Figure S5. circPGR promotes growth, migration and invasion in MCF7 cells.**

(A) MCF7 cells were transfected with control vector (circCTL) or vector expressing circPGR followed by RT-qPCR to examine the expression of circPGR ( $\pm$  s.e.m., \*\*\* $P < 0.001$ ).

(B, C, D, F, H) MCF7 cells as described in (A) were subjected to cell proliferation assay (B), FACS analysis (C), colony formation assay (D), wound healing assay (F), and transwell assay (H) ( $\pm$  s.e.m., \* $P < 0.05$ ).

(E, G, I) Quantification of the crystal violet dye (D), wound closure (F) and number of colonies (H) as shown in (E), (G) and (I), respectively ( $\pm$  s.e.m., \* $P < 0.05$ , \*\*\* $P < 0.001$ ).

**Figure S6. Knockdown of circPGR inhibits growth, migration and invasion in T47D cells.**

(A, B, E, G) T47D cells were transfected with control siRNA (siCTL) or siRNA specifically targeting circPGR (si-circPGR#1) followed by cell proliferation assay (A), FACS analysis (B), wound healing assay (E), and transwell assay (G) ( $\pm$  s.e.m., \* $P < 0.05$ , \*\* $P < 0.01$ ).

(C) T47D cells were infected with lenti-viral control shRNA (sh-CTL) or shRNA specifically targeting circPGR (sh-circPGR) followed by colony formation assay ( $\pm$  s.e.m., \*\*\* $P < 0.001$ ).

(D, F, H) Quantification of the crystal violet dye (D), wound closure (F) and number of colonies (H) as shown in (C), (E) and (G), respectively ( $\pm$  s.e.m., \* $P < 0.05$ , \*\*\* $P < 0.001$ ).

**Figure S7. circPGR promotes growth, migration and invasion in T47D cells.**

(A, B, C, E, G) T47D cells were transfected with control vector (circCTL) or vector expressing circPGR followed by cell proliferation assay (A), FACS analysis (B), colony formation assay (C), wound healing assay (E), and transwell assay (G) ( $\pm$  s.e.m., \*\* $P < 0.01$ , \*\*\* $P < 0.001$ ).

(D, F, H) Quantification of the crystal violet dye (D), wound closure (F) and number of colonies (H) as shown in (C), (E) and (G), respectively ( $\pm$  s.e.m., \* $P < 0.05$ , \*\* $P < 0.01$ , \*\*\* $P < 0.001$ ).

**Figure S8. CircPGR is stably localized in the cytosol of cells.**

(A) T47D cells cultured in stripping medium and treated with or without estrogen ( $E_2$ ,  $10^{-7}$  M) for duration as indicated were subjected to RNA extraction, reverse transcription and standard PCR by using primer sets specifically targeting circPGR or *PGR*. The resultant PCR products were separated by DNA electrophoresis. Actin was served as a loading control. DNA marker (M) was shown as indicated. bp: base pair.

(B) MCF7 cells were cultured in stripping medium and treated with or without estrogen ( $E_2$ ,  $10^{-7}$  M, 1 h) followed by ER $\alpha$  ChIP-seq analysis, and UCSC genome browser views of ER $\alpha$  binding on *PGR* gene region as well as distal enhancer (E) were shown. N.C: negative control region; TSS: transcription start site; Blue: control (CTL); Red: estrogen ( $E_2$ ).

(C) MCF7 cells were cultured in stripping medium and treated with or without estrogen ( $E_2$ ,  $10^{-7}$  M, 1 h) followed by ChIP-qPCR analysis to examine the binding of ER $\alpha$ . Data shown was the percentage of input ( $\pm$  s.e.m., \*\*\* $P < 0.001$ , NS: non-significant).

(D) MCF7 cells were cultured in stripping medium and pre-treated with or without ICI 182,780 (ICI,  $10^{-7}$  M) for 12 h before estrogen ( $E_2$ ,  $10^{-7}$  M) treatment for another 6 h followed by RNA extraction and RT-qPCR analysis to examine the expression of circPGR. Data shown was the relative fold change compared to control samples (CTL) after normalization to actin ( $\pm$  s.e.m., \*\*\* $P < 0.001$ ).

(E) CircPGR RNA-FISH analysis was performed in MCF7 cells transfected with control siRNA (siCTL) or two independent siRNA targeting *PGR* (siPGR#1 and siPGR#2) and treated with estrogen ( $E_2$ ,  $10^{-7}$  M, 6 h). Red: circPGR; Blue: DAPI.

**Figure S9. circPGR regulates the expression of a cohort of cell cycle genes in T47D cells.**

(A, B) T47D cells transfected with control siRNA (si-CTL) or two independent siRNAs specific against circPGR (si-circPGR#1 and si-circPGR#2) were subjected to RT-qPCR analysis to

examine the expression of circPGR (A), *CCND1*, *CHEK2* and *CDK6* (B) as indicated. Data shown were the relative fold change compared with control samples after normalization to actin ( $\pm$ s.e.m., \*\*\* $P < 0.001$ ).

(C) T47D cells transfected with control siRNA (siCTL) or two independent siRNAs specific against *PGR* (siPGR#1 and siPGR#2) were subjected to RT-qPCR analysis to examine the expression of *CCND1*, *CHEK2* and *CDK6* as indicated. Data shown were the relative fold change compared with control samples after normalization to actin ( $\pm$ s.e.m., \*\* $P < 0.01$ , NS: non-significant).

(D, E) Kaplan Meier survival analyses (OS, overall survival) for ER-positive (ER<sup>+</sup>) (D) and ER-negative (ER<sup>-</sup>) (E) breast cancer patients using genes positively-regulated by circPGR as input in GOBO.

**Figure S10. CircPGR acts as a ceRNA to promote cell cycle progression.**

(A) CeRNA network analysis revealed that circPGR sponge three miRNAs with high confidence, miR-301a-5p, miR-3619-3p and miR-812, to regulate its target genes.

(B) 3' UTR of *CDK6*, *CDK1* or *CHEK2* (3' UTR (WT)) as well as 3' UTR (MT) were cloned into a luciferase reporter vector, which were then transfected into HEK293T cells with control vector (circCTL) or vector expressing circPGR followed by luciferase activity measurement (NS: non-significant).

(C, D) MCF7 cells were transfected with control mimic (CTL mimic), miR-301a-5p inhibitor or miR-301a-5p mimic followed by cell proliferation assay (C) and colony formation assay (D). ( $\pm$ s.e.m., \* $P < 0.05$ , NS: non-significant).

(E) Quantification of the crystal violet dye as shown in (D) ( $\pm$  s.e.m., \*\*\* $P < 0.001$ , NS: non-significant).

(F) The standard curves for copy number analysis of molecules as indicated were shown. Two-fold serial dilutions of reference standard was first performed, and Ct value from qPCR analysis versus the dilution factor was plotted, fitting the data to a straight line.

(G) MCF7 cells cultured in stripping medium for three days were treated with or without estrogen ( $10^{-7}$  M) for 6 h, and  $1.5 \times 10^6$  cells were then used for copy number analysis based on the standard curves as shown in (F).

**Figure S11. CircPGR's target genes are highly expressed in clinical breast cancer samples.**

(A, B) RNA samples extracted from 15 pairs of ER-negative breast tumor and adjacent normal tissues, and 15 pairs of ER-positive breast tumor and adjacent normal tissues were subjected to RT-qPCR analysis to examine the expression of *CDK1*, *CDK6* and *CHEK2* (A) and miR-301a-5p (B). Data shown was normalized to actin ( $\pm$ s.e.m., \*P < 0.05, \*\*P < 0.01, NS: non-significant).

**Supplementary table legends**

**Table S1. List of circRNAs detected from circRNA-seq in both control (CTL) and estrogen (E<sub>2</sub>)-treated conditions in MCF7 cells.**

**Table S2. List of genes positively- and negatively-regulated by circPGR in MCF7 cells.**

**Table S3. Sequence information for all qPCR primers used in the current study.** Sequence information of qPCR primers designed to detect the expression of mRNAs or circRNAs were shown. F: forward; R: reverse.

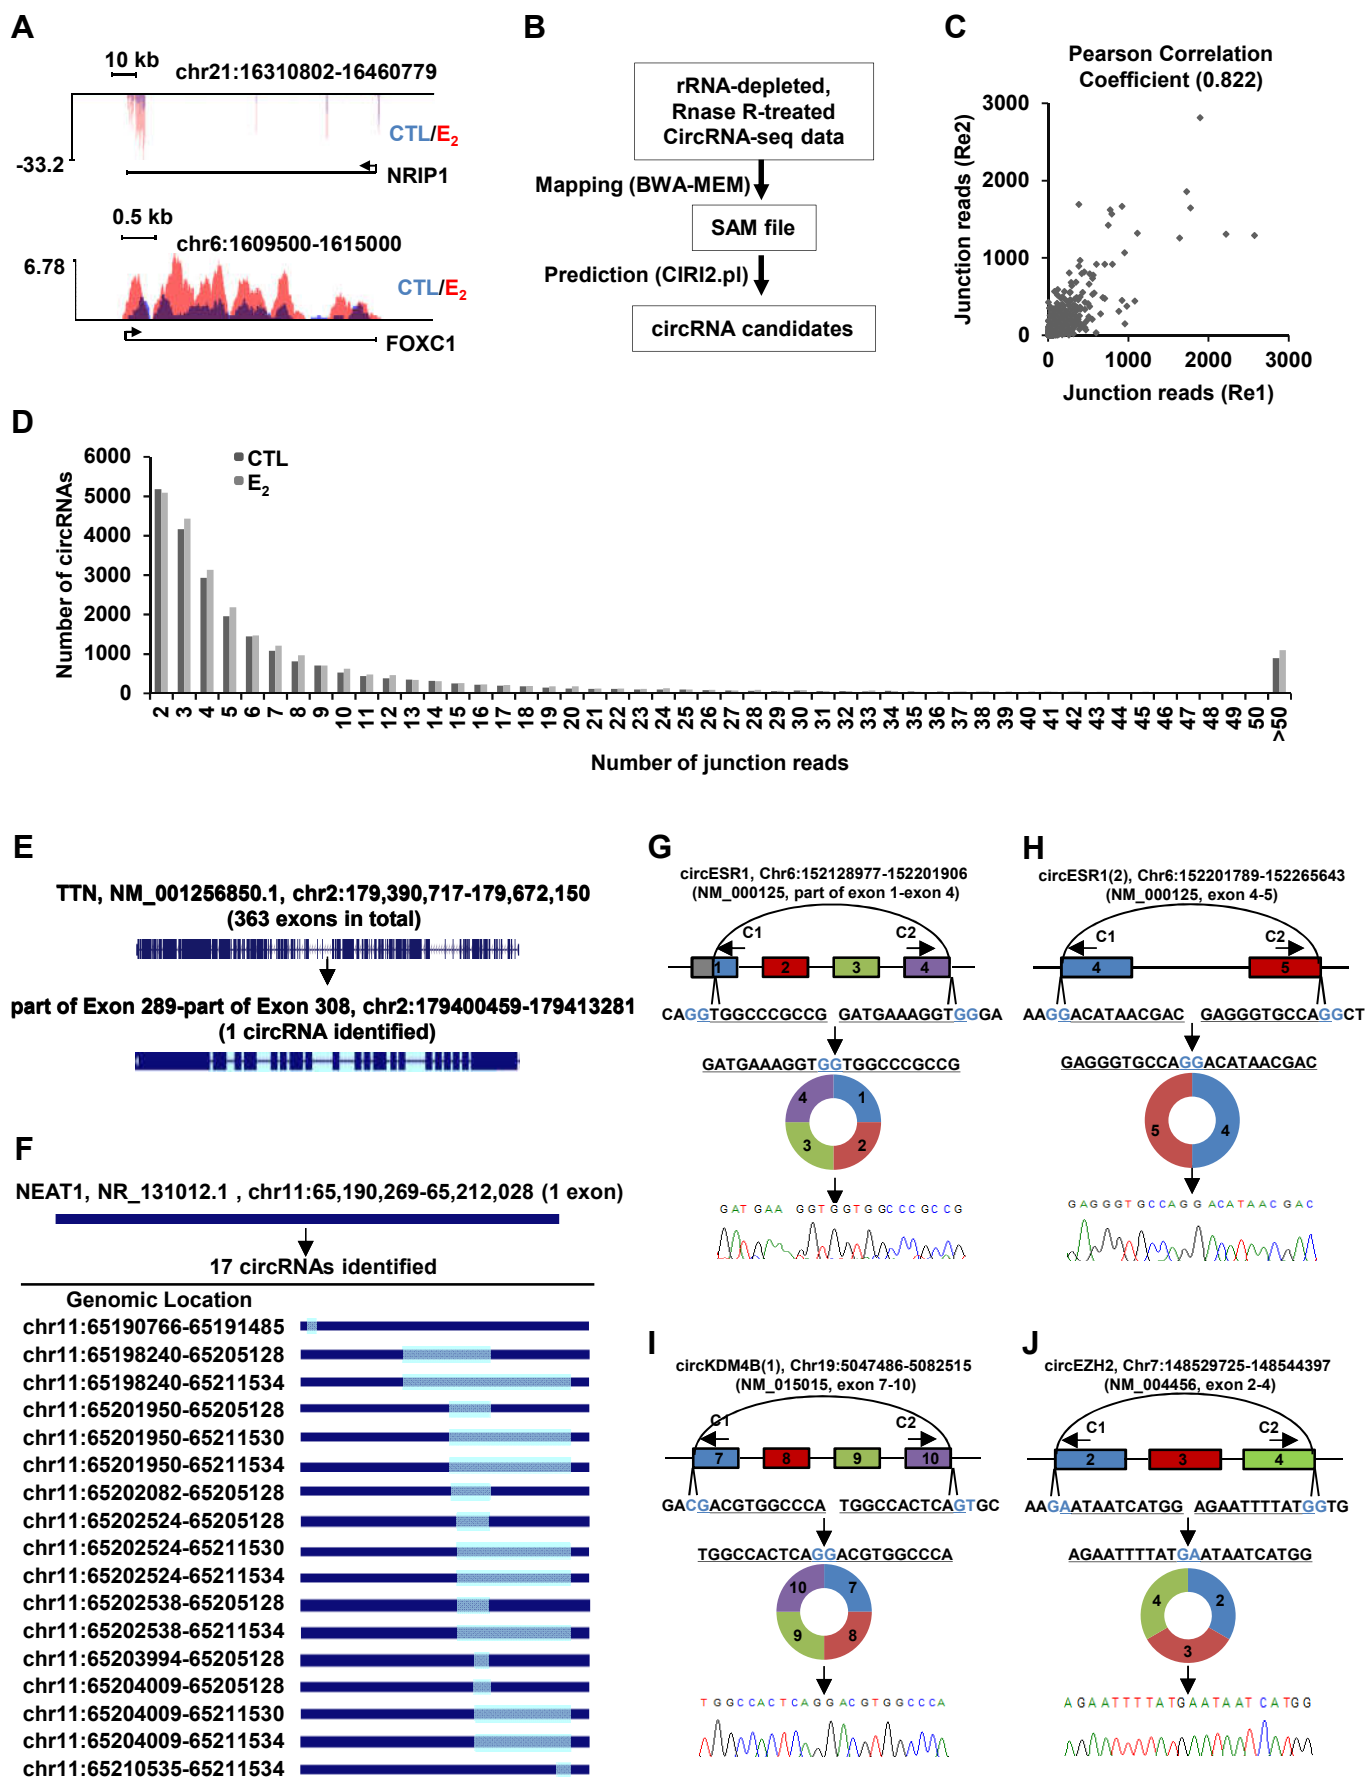

Figure S1

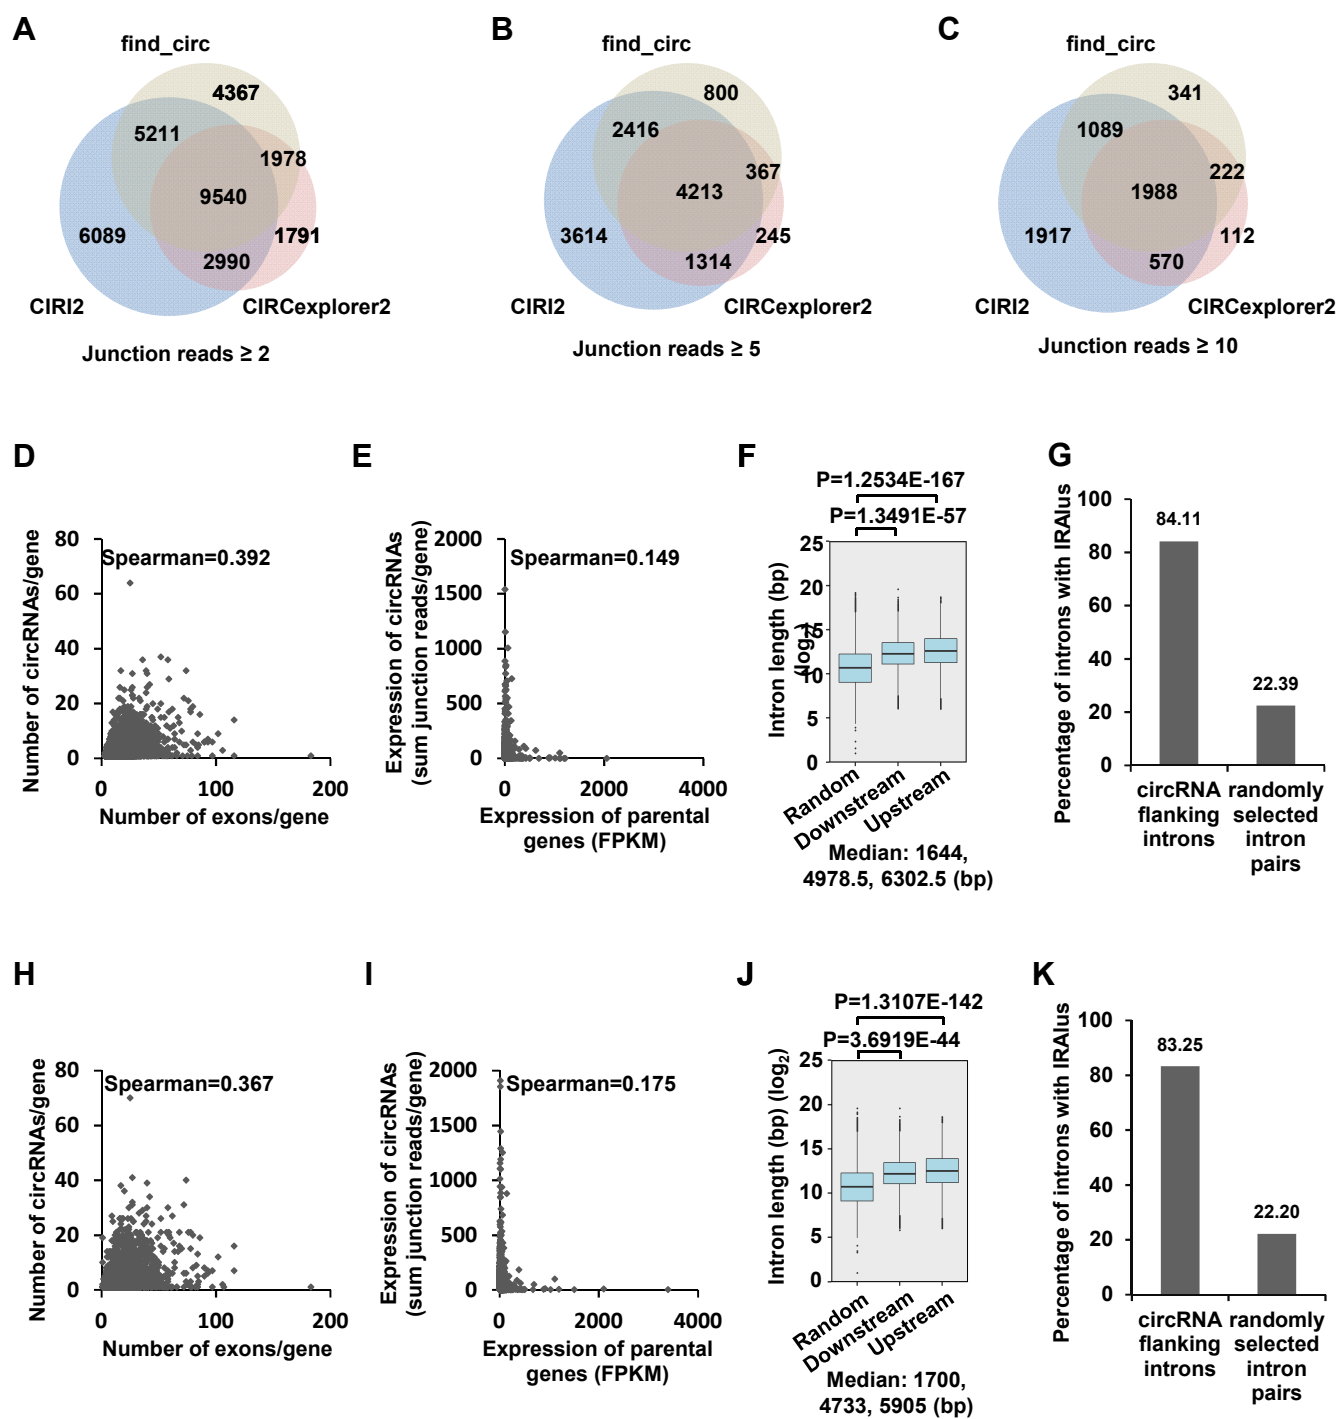

**Figure S2**

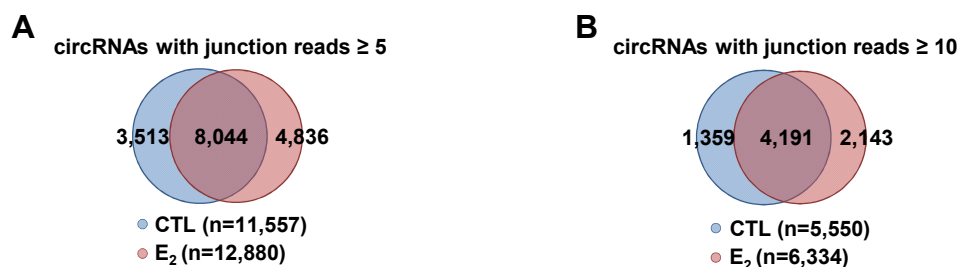

**C**

| CircRNA         | Chr   | Start     | End       | Parental gene | Strand | CircRNA type | Junction reads (CTL) | Junction reads (E <sub>2</sub> ) | Ct value (CTL, mean) | Ct value (E <sub>2</sub> , mean) | Fold change (E <sub>2</sub> /CTL) |
|-----------------|-------|-----------|-----------|---------------|--------|--------------|----------------------|----------------------------------|----------------------|----------------------------------|-----------------------------------|
| circPGR(6)      | chr11 | 100933178 | 100996889 | PGR           | -      | exon         | 0                    | 23                               | 24.22                | 21.93                            | 4.636957                          |
| circFMN1(1)     | chr15 | 33180373  | 33194241  | FMN1          | -      | exon         | 8                    | 12                               | 24.41                | 22.13                            | 3.854164                          |
| circCA12(2)     | chr15 | 63637676  | 63638908  | CA12          | -      | exon         | 0                    | 4                                | 22.02                | 20.31                            | 3.204261                          |
| circLETMD1      | chr12 | 51442817  | 51451911  | LETMD1        | +      | exon         | 5                    | 26                               | 26.18                | 25.48                            | 2.216999                          |
| circSLC25A24(3) | chr1  | 108724563 | 108728576 | SLC25A24      | -      | exon         | 5                    | 8                                | 26.58                | 25.41                            | 1.856916                          |
| circFIRRE       | chrX  | 130883334 | 130928494 | FIRRE         | -      | exon         | 95                   | 102                              | 22.31                | 21.28                            | 1.664765                          |
| circCDC25A(2)   | chr3  | 48209336  | 48219478  | CDC25A        | -      | exon         | 2                    | 15                               | 29.06                | 27.77                            | 1.663955                          |
| circPLXNA4(3)   | chr7  | 131908286 | 131913228 | PLXNA4        | -      | exon         | 0                    | 4                                | 23.34                | 22.39                            | 1.642703                          |
| circMYBL1       | chr8  | 67513933  | 67514758  | MYBL1         | -      | exon         | 4                    | 14                               | 18.96                | 17.91                            | 1.520707                          |
| circSLC26A2     | chr5  | 149357191 | 149361860 | SLC26A2       | +      | exon         | 0                    | 3                                | 22.00                | 21.33                            | 1.497724                          |
| circSGK223(2)   | chr8  | 8233763   | 8239344   | SGK223        | -      | exon         | 0                    | 3                                | 22.48                | 22.02                            | 1.381539                          |
| circMAT1A       | chr10 | 82039929  | 82043794  | MAT1A         | -      | exon         | 0                    | 2                                | 19.35                | 18.84                            | 1.368159                          |
| circKCNK5       | chr6  | 39161945  | 39163763  | KCNK5         | -      | exon         | 4                    | 4                                | 21.34                | 20.97                            | 1.309321                          |
| circSLC25A19(1) | chr17 | 73279504  | 73282883  | SLC25A19      | -      | exon         | 3                    | 18                               | 21.40                | 21.02                            | 1.3029                            |
| circSLC25A24(4) | chr1  | 108697605 | 108728576 | SLC25A24      | -      | exon         | 6                    | 7                                | 25.28                | 25.03                            | 1.206263                          |
| circACOT2       | chr14 | 74035982  | 74040294  | ACOT2         | +      | exon         | 0                    | 4                                | 22.49                | 22.54                            | 0.974017                          |
| circPLXNA4(2)   | chr7  | 131844232 | 131853331 | PLXNA4        | -      | exon         | 0                    | 3                                | 22.51                | 22.60                            | 0.969025                          |
| circSGK223(1)   | chr8  | 8196994   | 8215345   | SGK223        | -      | intron       | 0                    | 4                                | 12.74                | 12.79                            | 0.96619                           |
| circNR5A2       | chr1  | 200080330 | 200090083 | NR5A2         | +      | exon         | 0                    | 4                                | 23.42                | 23.55                            | 0.934757                          |
| circZKSCAN1     | chr7  | 99621042  | 99627998  | ZKSCAN1       | +      | exon         | 15                   | 23                               | 23.20                | 22.99                            | 0.862602                          |

**Figure S3**

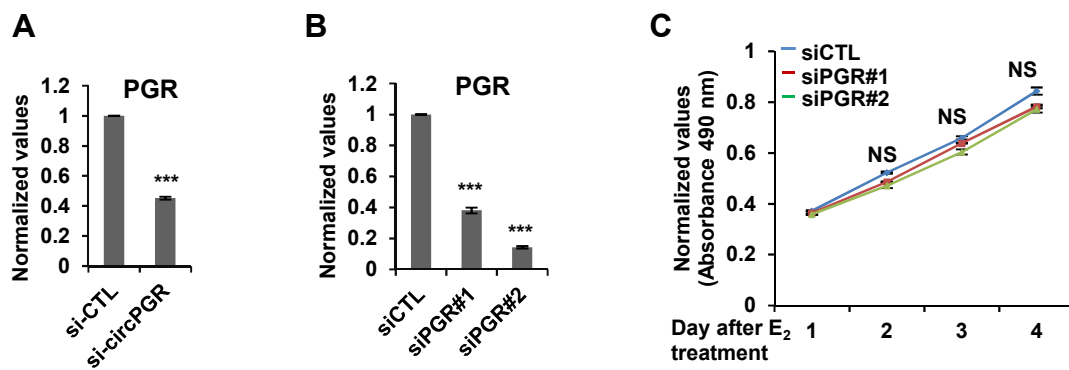

**Figure S4**

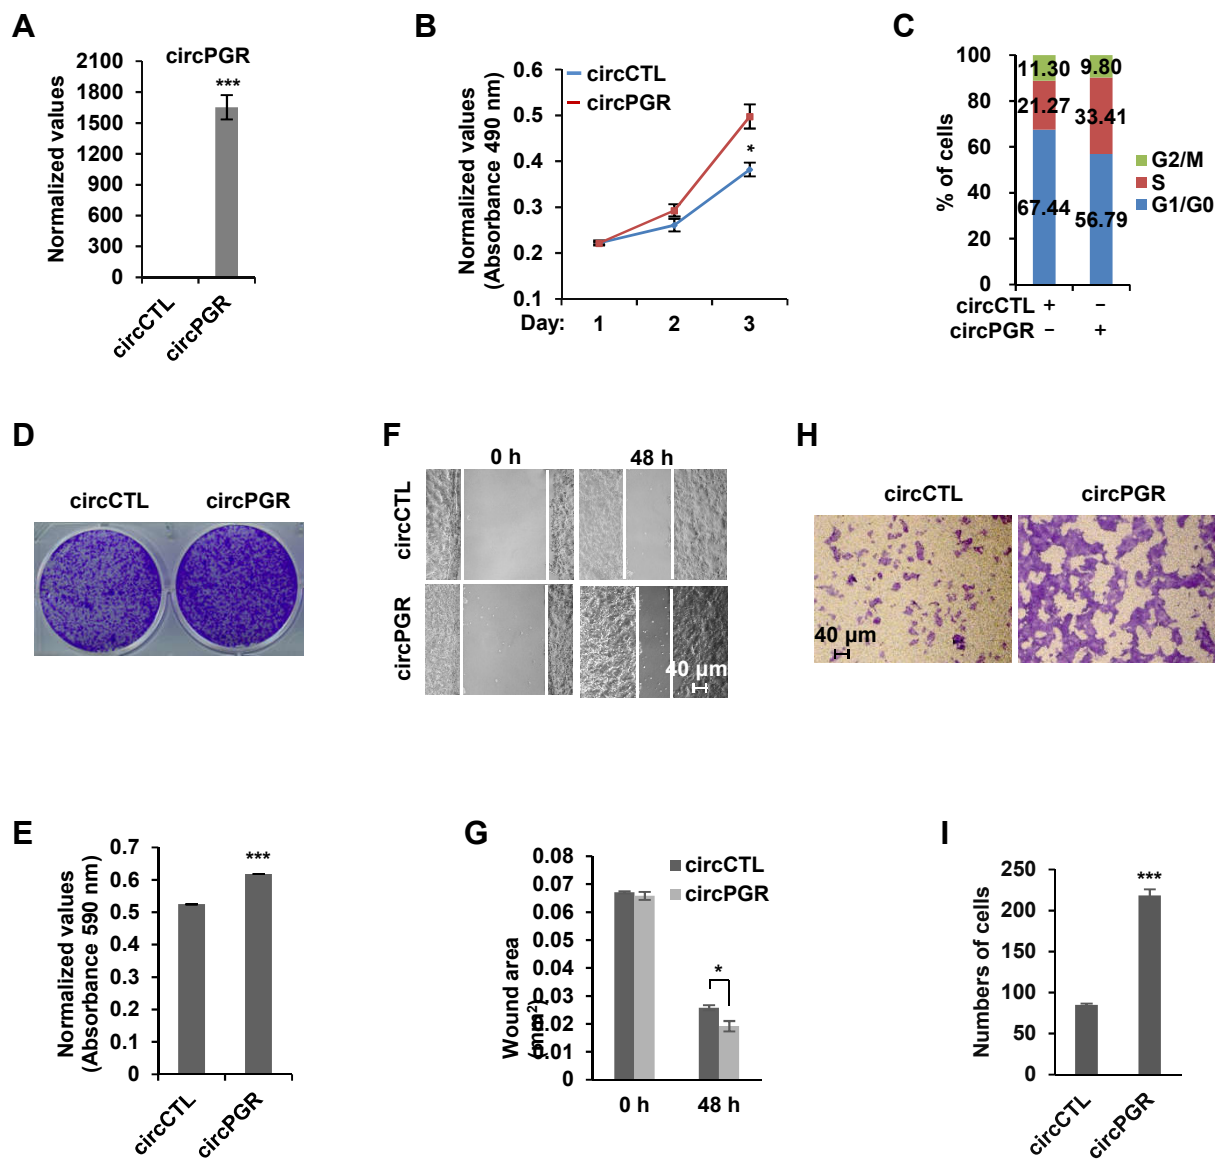

**Figure S5**

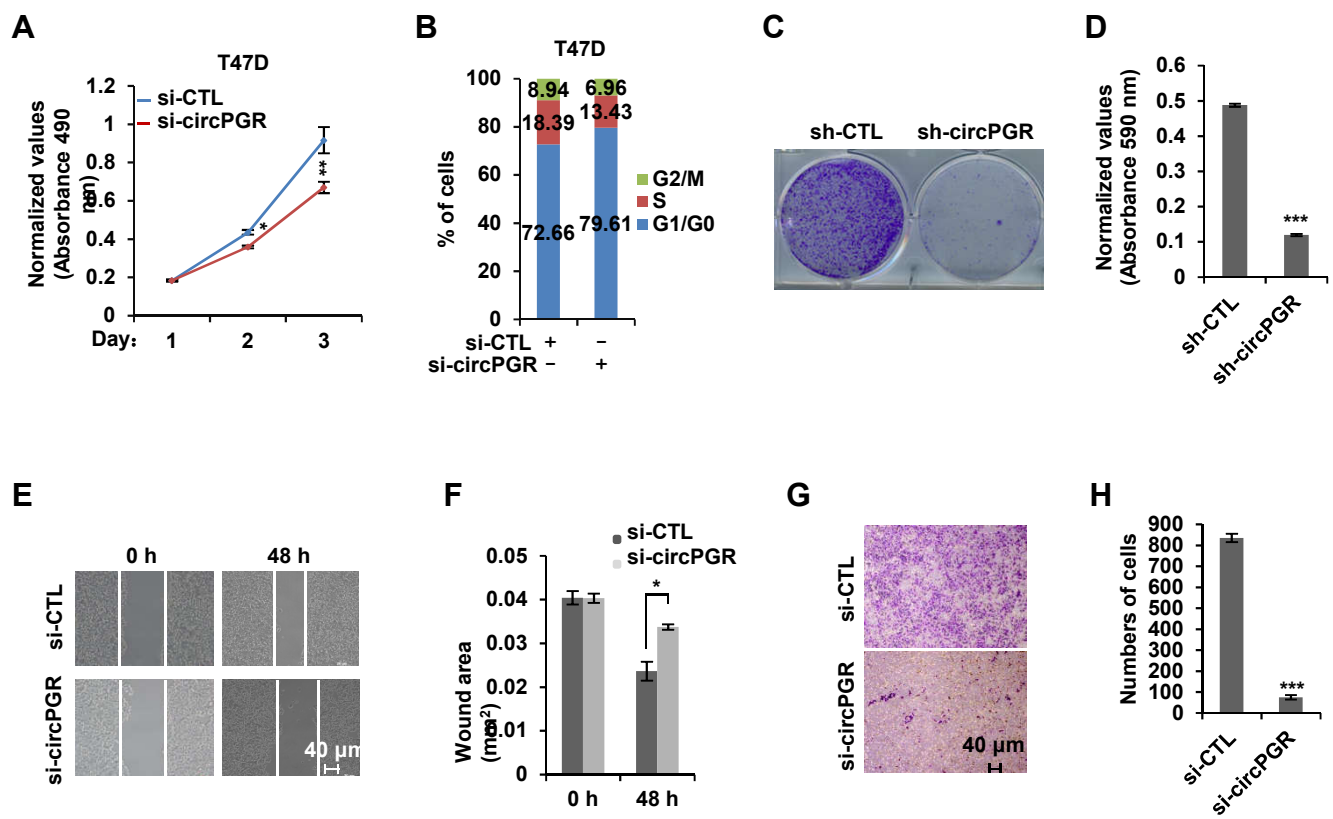

**Figure S6**

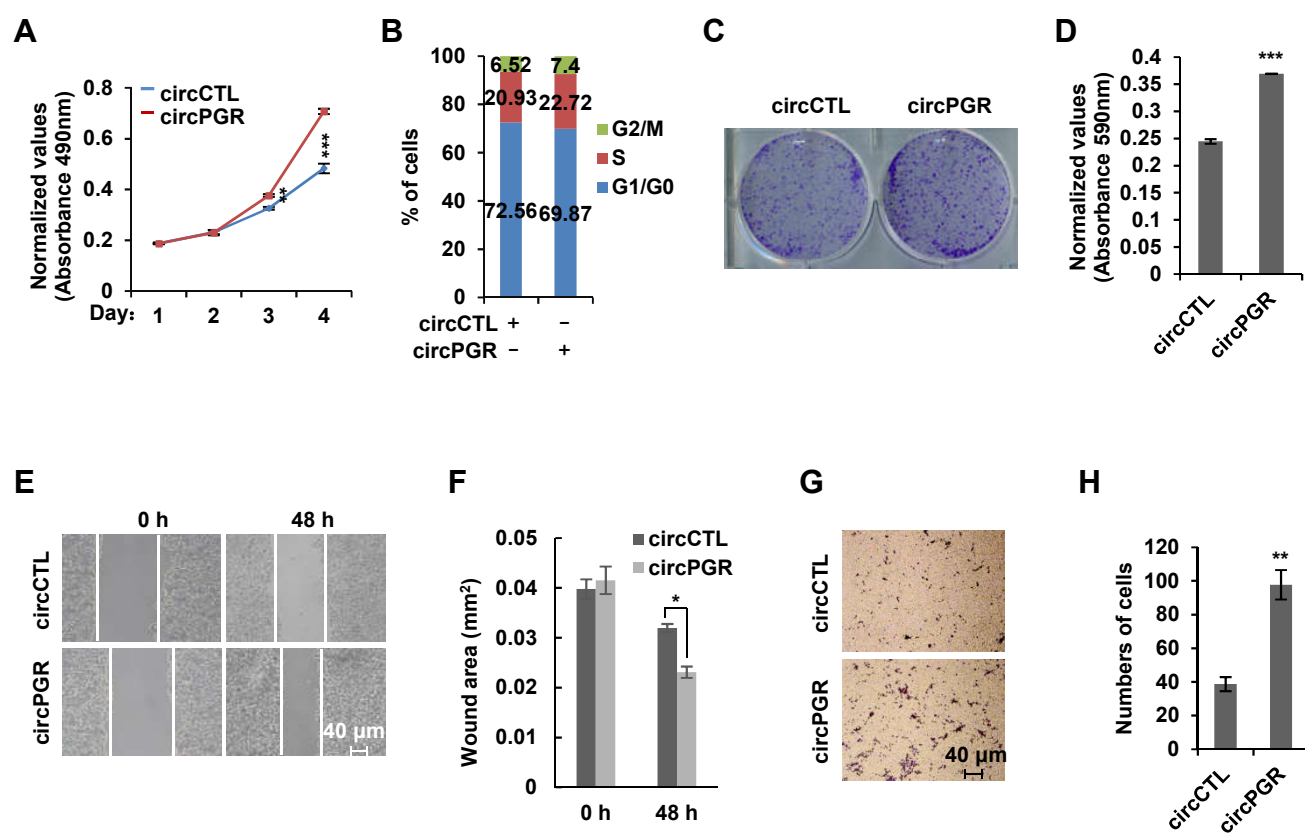

**Figure S7**

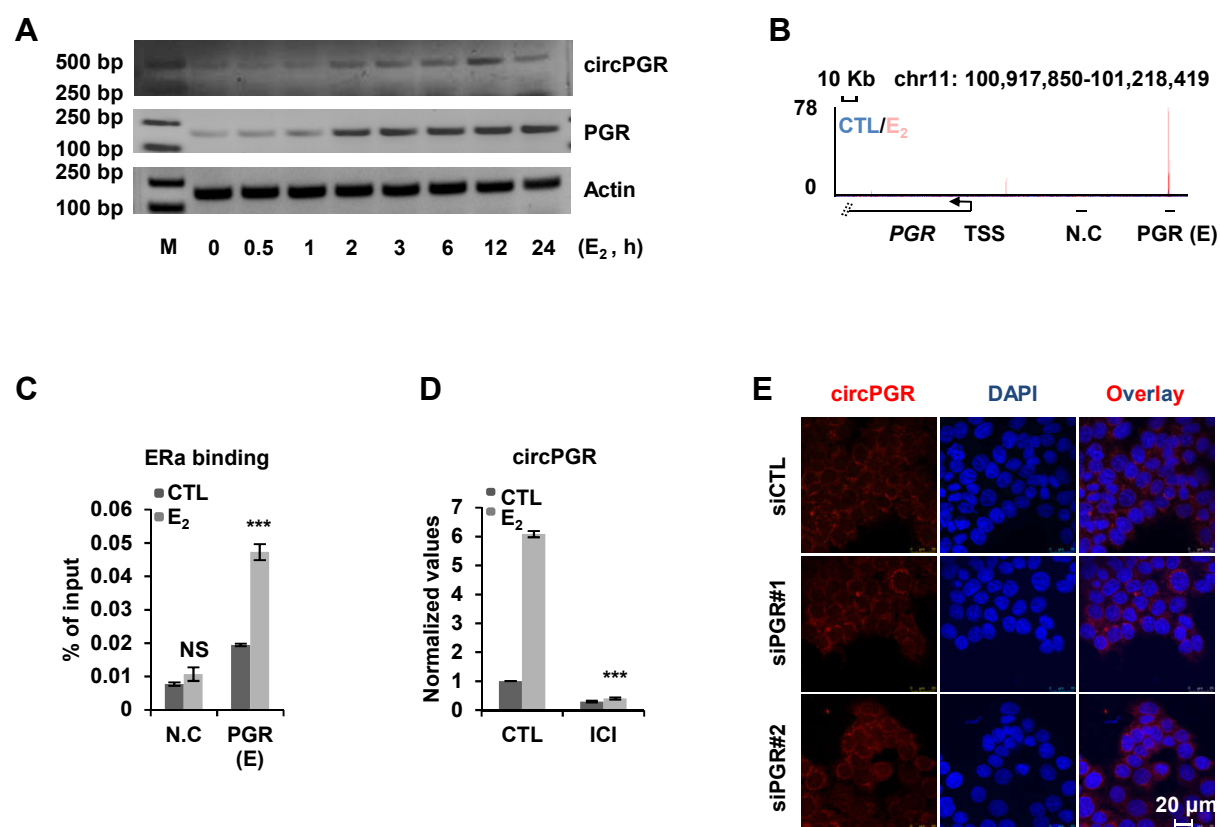

**Figure S8**

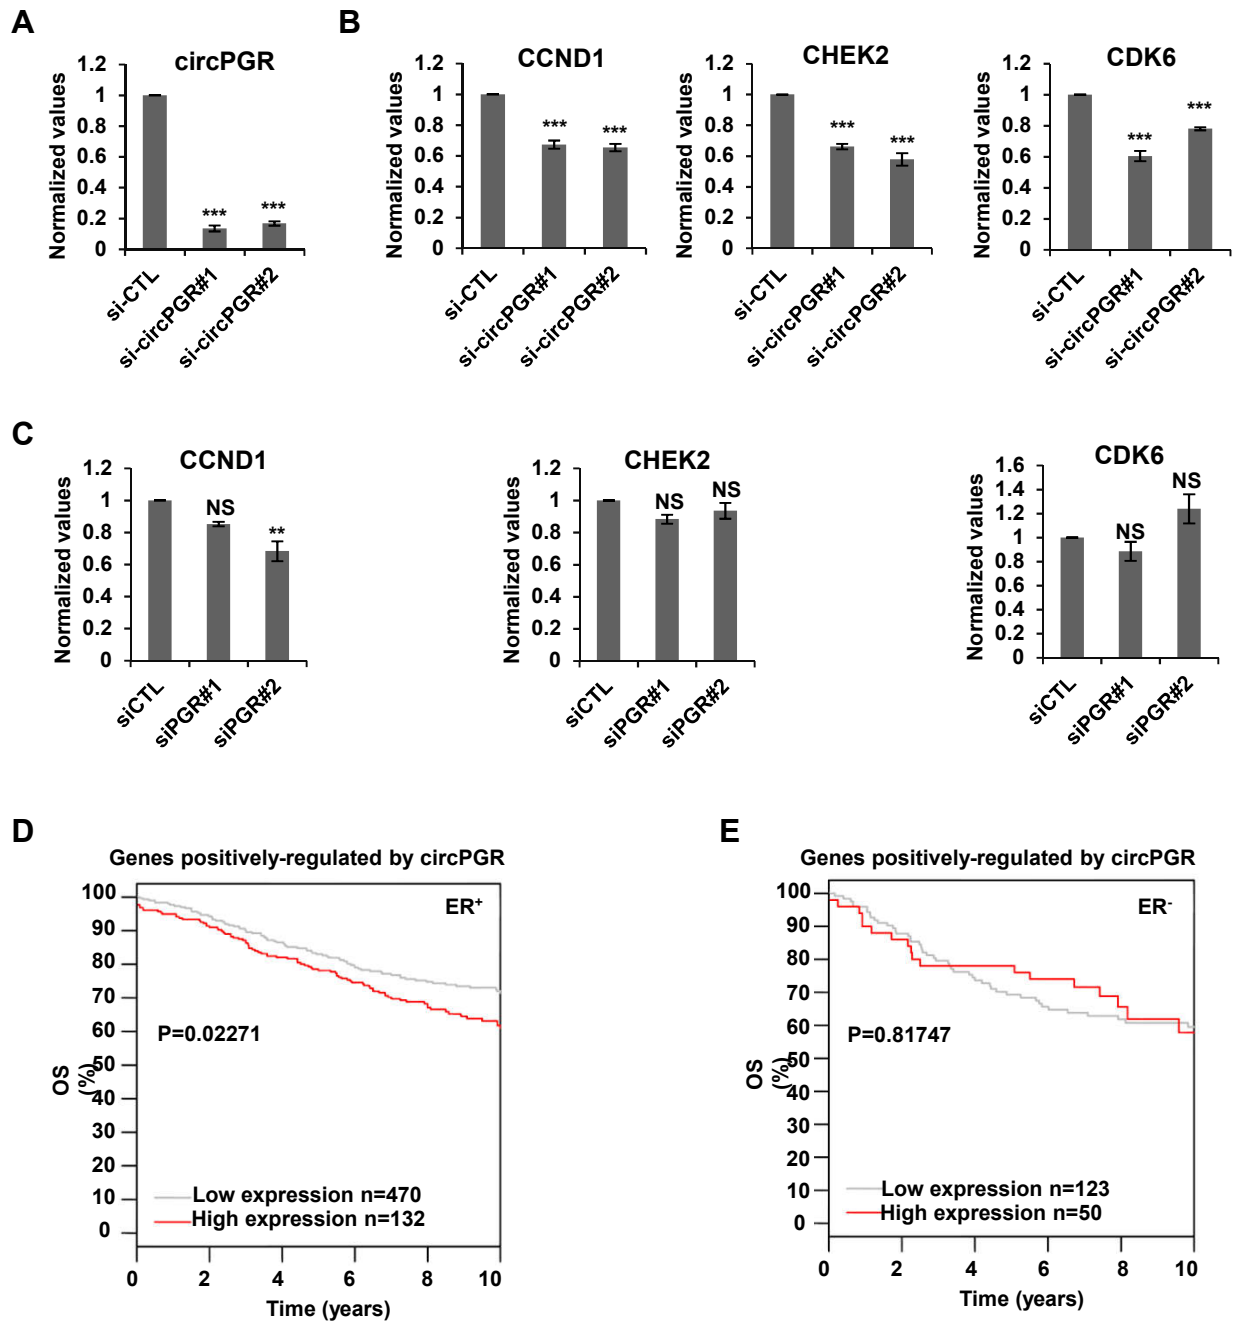

**Figure S9**

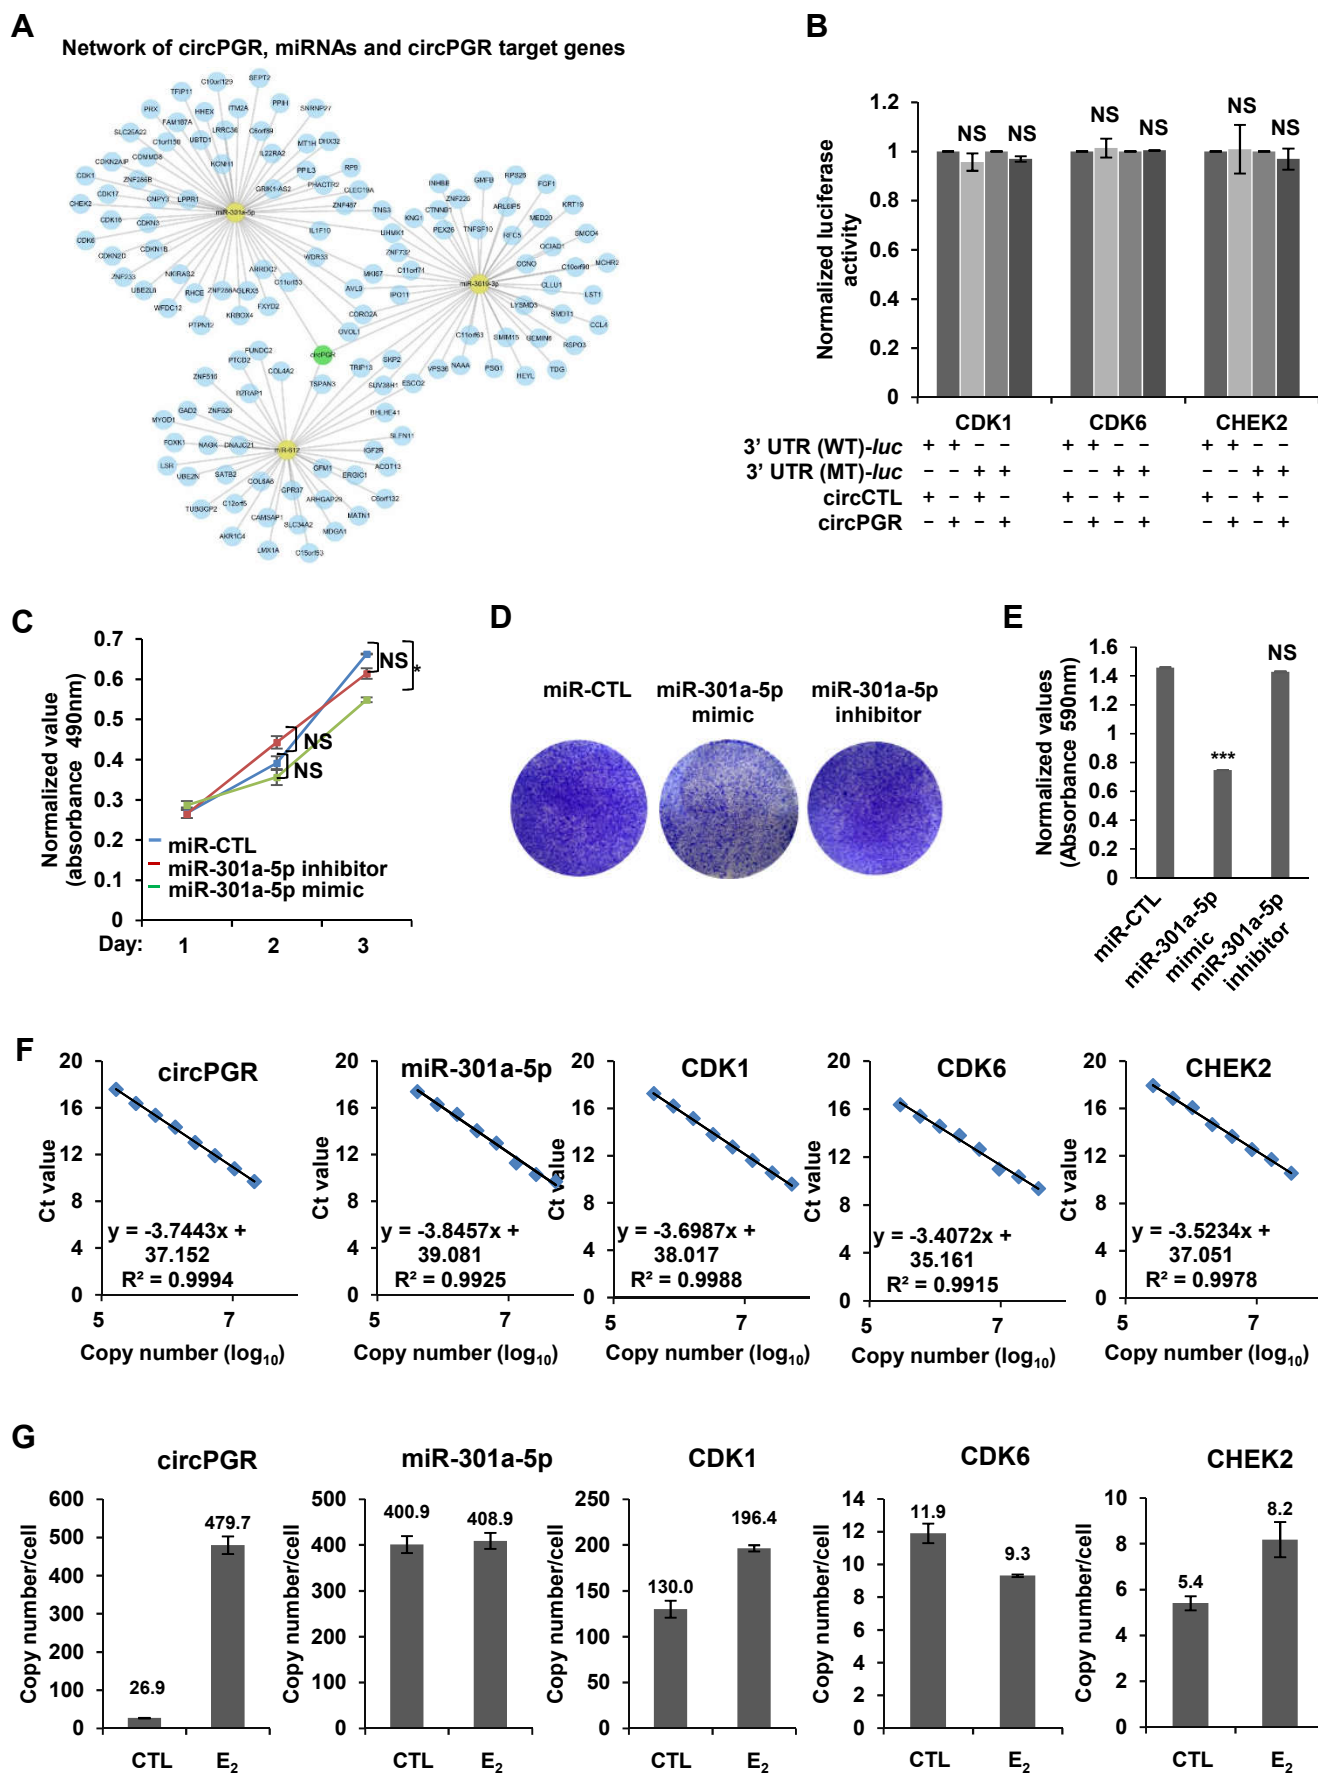

**Figure S10**

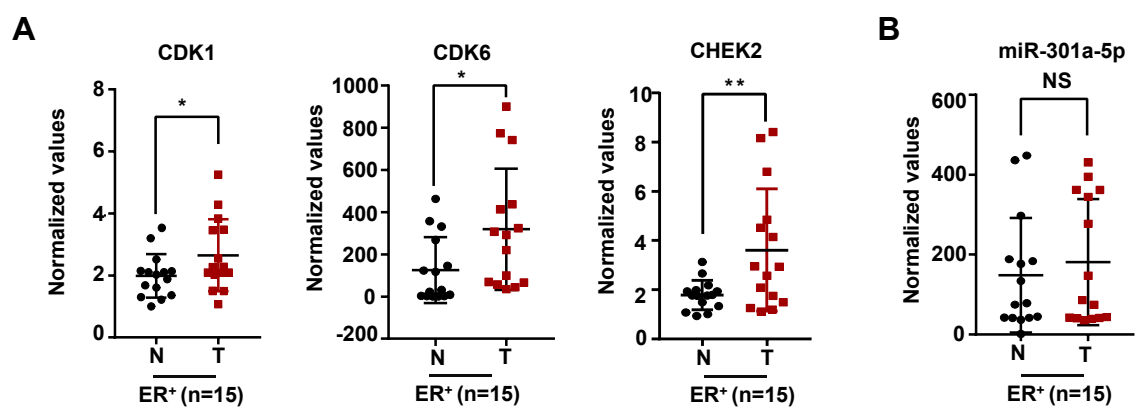

**Figure S11**
